# Supplementary material for: Impact of liver cirrhosis on the clinical outcomes of patients with COVID-19: a nationwide cohort study of Korea
Source: PubMed Central journal article supplement — Korean J Intern Med. 2021 Aug 18;36(5):1092–101. doi: 10.3904/kjim.2020.486 (PMC8435512; doi:10.3904/kjim.2020.486), 2021-08-18
Supplement: kjim-2020-486-suppl1.pdf [file kjim-2020-486-suppl1.pdf]

**Supplementary Table 1. Definition of the comorbidities**

| Diagnosis                     | ICD-10 codes                                                                  | Claim codes                                                                  |
|-------------------------------|-------------------------------------------------------------------------------|------------------------------------------------------------------------------|
| Decompensated liver cirrhosis | K72.0, K72.1, K72.9, R18, I85.0, I98.3                                        | Admission or outpatient department $\geq 1$                                  |
| Diabetes                      | E10–E14                                                                       | Prescription of anti-diabetic drugs $\geq 1$                                 |
| Hypertension                  | I10–I11                                                                       | Prescription of anti-hypertensive drugs $\geq 1$                             |
| Dyslipidemia                  | E78                                                                           | Prescription of lipid-lowering drugs $\geq 1$                                |
| Cardiovascular disease        | I21–I24 for myocardial infarction, I60–I69 for stroke                         | Admission or outpatient department $\geq 1$                                  |
| Cancer                        | C00–C97                                                                       | Admission or outpatient department $\geq 1$                                  |
| COPD                          | J41–J44                                                                       | Admission or outpatient department $\geq 1$                                  |
| Asthma                        | J45–J46                                                                       | Admission or outpatient department $\geq 1$                                  |
| ESRD with dialysis            | N18–N19, Z49, Z99.2                                                           | O701–O702 for hemodialysis $\geq 1$ or O707 for peritoneal dialysis $\geq 1$ |
| Immunocompromised status      | M05–M09, M30–M36 for autoimmune disease, B20–B24, F24, O987, Z21 for HIV/AIDS | Admission or outpatient department $\geq 1$                                  |

ICD-10, International Classification of Diseases, 10th revision; COPD, chronic obstructive pulmonary disease; ESRD, end-stage renal disease; HIV, human immunodeficiency virus; AIDS, acquired immune deficiency syndrome.
