# Supplementary material for: Impact of liver cirrhosis on the clinical outcomes of patients with COVID-19: a nationwide cohort study of Korea
Source: PubMed Central journal article supplement — Korean J Intern Med. 2021 Aug 18;36(5):1092–101. doi: 10.3904/kjim.2020.486 (PMC8435512; doi:10.3904/kjim.2020.486), 2021-08-18
Supplement: kjim-2020-486-suppl2.pdf [file kjim-2020-486-suppl2.pdf]

**Supplementary Table 2. ICD-10 codes for complications**

|                                              | ICD-10 codes or HIRA general name code                                                                                                                                                                                |
|----------------------------------------------|-----------------------------------------------------------------------------------------------------------------------------------------------------------------------------------------------------------------------|
| <b>Severe complications</b>                  |                                                                                                                                                                                                                       |
| Oxygen therapy                               | M0040, M0046, M5850, M5857, M5858, M5859, M5860                                                                                                                                                                       |
| Vasopressors                                 | Norepinephrine: 2031<br>Epinephrine: 3138, 1526, 6694<br>Vasopressin: 2473<br>Dopamine: 1487, 3894, 3895, 3897, 4295<br>Dobutamine: 1482, 3890, 3996                                                                  |
| Admission for intensive care unit            | Claim codes including 'AJ'                                                                                                                                                                                            |
| Continuous renal replacement therapy         | O7031, O7032, O7033, O7034, O7035, O7051, O7052, O7053, O7054, O7055                                                                                                                                                  |
| <b>Liver cirrhosis related complications</b> |                                                                                                                                                                                                                       |
| Varix                                        | At least 1 or more medical record by year via I850, I859,<br>At least 1 or more medical record by year via I850, I859 & K74<br>Prescribed with beta-blocker (2199, 1250, 6622) along with K74                         |
| Ascites                                      | At least 1 or more medical record by year via R18 & K74<br>Prescribed with diuretic (1638, 2420, 2627, 2311) along with K74<br>Prescribed with albumin (2271, 3697) along with K74 and abdominal paracentesis (C8050) |
| Hepatorenal syndrome                         | At least 1 or more medical record by year via K767<br>Prescribed with terlipressin (2360) & albumin (2271, 3697) for more than 4 days                                                                                 |
| Spontaneous bacterial peritonitis            | At least 1 or more medical record by year via K658, K659, K74, and abdominal paracentesis (C8050) simultaneously                                                                                                      |
| Encephalopathy                               | Prescribed with duphalac (1808) along with K74<br>Prescribed with duphalac (1808) along with enema procedure                                                                                                          |

ICD-10, International Classification of Diseases, 10th revision; HIRA, Health Insurance Review and Assessment Service.
