# Supplementary material for: Impact of liver cirrhosis on the clinical outcomes of patients with COVID-19: a nationwide cohort study of Korea
Source: PubMed Central journal article supplement — Korean J Intern Med. 2021 Aug 18;36(5):1092–101. doi: 10.3904/kjim.2020.486 (PMC8435512; doi:10.3904/kjim.2020.486), 2021-08-18
Supplement: kjim-2020-486-suppl3.pdf [file kjim-2020-486-suppl3.pdf]

**Supplementary Table 3. Baseline characteristics of patients with liver cirrhosis grouped according to the COVID-19 infection before case-control matching (n = 13,681)**

| Characteristic                               | LC+ COVID+<br>(n = 67) | LC+ COVID-<br>(n = 6,395) | LC- COVID+<br>(n = 7,219) | p value |
|----------------------------------------------|------------------------|---------------------------|---------------------------|---------|
| Male sex <sup>a</sup>                        | 40 (59.7)              | 4,076 (63.7)              | 2,896 (40.1)              | < 0.01  |
| Age, yr <sup>a,b</sup>                       | 59.9 ± 15.7            | 62.3 ± 14.3               | 47.2 ± 18.9               | < 0.01  |
| Region of diagnosis                          |                        |                           |                           |         |
| Daegu & Gyeongbuk <sup>a</sup>               | 43 (64.2)              | 770 (12.0)                | 3,865 (53.5)              | < 0.01  |
| Tested hospital                              |                        |                           |                           |         |
| 3rd <sup>a</sup>                             | 9 (13.4)               | 3,300 (51.6)              | 1,389 (19.2)              | < 0.01  |
| Comorbidities                                |                        |                           |                           |         |
| Decompensated liver cirrhosis <sup>a,b</sup> | 19 (28.4)              | 3,199 (50.0)              | 0                         | < 0.01  |
| Diabetes <sup>a</sup>                        | 21 (31.3)              | 2,488 (38.9)              | 802 (11.1)                | < 0.01  |
| Hypertension <sup>a,b</sup>                  | 27 (40.3)              | 3,645 (57.0)              | 1,714 (23.7)              | < 0.01  |
| Dyslipidemia                                 | 19 (28.4)              | 2,329 (36.4)              | 1,584 (21.9)              | < 0.01  |
| Cardiovascular disease                       | 9 (13.4)               | 1,393 (21.8)              | 540 (7.5)                 | < 0.01  |
| Cancer <sup>a,b</sup>                        | 12 (17.9)              | 3,022 (47.3)              | 330 (4.6)                 | < 0.01  |
| COPD <sup>a</sup>                            | 9 (13.4)               | 1,763 (27.6)              | 726 (10.1)                | < 0.01  |
| Asthma                                       | 12 (17.9)              | 1,472 (23.0)              | 915 (12.7)                | < 0.01  |
| ESRD with dialysis <sup>a</sup>              | 0                      | 387 (6.1)                 | 20 (0.3)                  | < 0.01  |
| Immunocompromised status <sup>a</sup>        | 9 (13.4)               | 480 (7.5)                 | 265 (3.7)                 | < 0.01  |
| CCI <sup>a,b</sup>                           | 4.3 ± 2.7              | 6.8 ± 3.8                 | 1.4 ± 1.9                 | < 0.01  |
| Severe complications <sup>a,b</sup>          | 18 (26.9)              | 1,068 (16.7)              | 686 (9.5)                 | < 0.01  |
| Oxygen therapy <sup>a,b</sup>                | 12 (17.9)              | 631 (9.9)                 | 574 (7.8)                 | < 0.01  |
| Vasopressors <sup>a</sup>                    | 4 (6.0)                | 267 (4.2)                 | 97 (1.3)                  | < 0.01  |
| Admission for intensive care unit            | 2 (3.0)                | 252 (3.9)                 | 110 (1.5)                 | < 0.01  |
| Continuous renal replacement therapy         | 1 (1.5)                | 44 (0.7)                  | 21 (0.3)                  | < 0.01  |
| Death <sup>a</sup>                           | 6 (9.0)                | 501 (7.8)                 | 225 (3.1)                 | < 0.01  |
| Liver cirrhosis related complications        |                        |                           |                           |         |
| Varix                                        | 3 (4.5)                | 524 (8.2)                 | -                         | 0.37    |
| Ascites                                      | 2 (3.0)                | 195 (3.1)                 | -                         | 1.00    |
| Hepatorenal syndrome                         | 2 (3.0)                | 350 (5.5)                 | -                         | 0.59    |
| Spontaneous bacterial peritonitis            | 0                      | 64 (1.0)                  | -                         | 1.00    |
| Encephalopathy                               | 0                      | 11 (0.2)                  | -                         | 1.00    |
| Encephalopathy                               | 3 (4.5)                | 233 (3.6)                 | -                         | 0.74    |

Values are presented as number (%) or mean ± standard deviation.

COVID-19, coronavirus disease 2019; LC, liver cirrhosis; COPD, chronic obstructive pulmonary disease; ESRD, end-stage renal disease; CCI, Charlson comorbidity index.

<sup>a</sup>p < 0.05 between LC+ COVID+ and LC- COVID+.

<sup>b</sup>p < 0.05 between LC+ COVID+ and LC+ COVID-.
